# Supplementary material for: Calcium complexes with imino-phosphinanilido chalcogenide ligands for heterofunctionalisation catalysis
Source: Royal Society of Chemistry journal article supplement (doi:10.1039/c6ra13117d), 2016-01-01
Supplement: c6ra13117d1.pdf [file c6ra13117d1.pdf]

## Supporting Information

### Calcium Complexes with Imino-phosphinanilido Chalcogenide Ligands for Heterofunctionalisation Catalysis

Srinivas Anga,<sup>†</sup> Jean-François Carpentier,<sup>\*§</sup> Tarun K. Panda,<sup>\*†</sup> Thierry Roisnel,<sup>§</sup> and Yann Sarazin<sup>\*§</sup>

**Table TS1. Crystallographic data and refinement parameters of L<sup>3</sup>H, 3 and 5.**

**F1.** Molecular structure and the XRD data for **4**.

- S1.** <sup>1</sup>H NMR spectrum (CDCl<sub>3</sub>, 500.13 MHz, 298 K) of Ph<sub>2</sub>PHNC<sub>6</sub>H<sub>4</sub>CH=N(Dipp) (**L<sup>0</sup>H**)
- S2.** <sup>31</sup>P{<sup>1</sup>H} NMR spectrum (CDCl<sub>3</sub>, 161.9 MHz, 298 K) of Ph<sub>2</sub>PHNC<sub>6</sub>H<sub>4</sub>CH=N(Dipp) (**L<sup>0</sup>H**)
- S3.** <sup>13</sup>C{<sup>1</sup>H} NMR spectrum (CDCl<sub>3</sub>, 125.76 MHz, 298 K) of Ph<sub>2</sub>PHNC<sub>6</sub>H<sub>4</sub>CH=N(Dipp) (**L<sup>0</sup>H**)
- S4.** <sup>1</sup>H NMR spectrum (CDCl<sub>3</sub>, 500.13 MHz, 298 K) of Ph<sub>2</sub>P(O)HNC<sub>6</sub>H<sub>4</sub>CH=N(Dipp) (**L<sup>1</sup>H**)
- S5.** <sup>31</sup>P{<sup>1</sup>H} NMR spectrum (CDCl<sub>3</sub>, 161.9 MHz, 298 K) of Ph<sub>2</sub>P(O)HNC<sub>6</sub>H<sub>4</sub>CH=N(Dipp) (**L<sup>1</sup>H**)
- S6.** <sup>13</sup>C{<sup>1</sup>H} NMR spectrum (CDCl<sub>3</sub>, 125.76 MHz, 298 K) of Ph<sub>2</sub>P(O)HNC<sub>6</sub>H<sub>4</sub>CH=N(Dipp) (**L<sup>1</sup>H**)
- S7.** <sup>1</sup>H NMR spectrum (CDCl<sub>3</sub>, 500.13 MHz, 298 K) of Ph<sub>2</sub>P(S)HNC<sub>6</sub>H<sub>4</sub>CH=N(Dipp) (**L<sup>2</sup>H**)
- S8.** <sup>31</sup>P{<sup>1</sup>H} NMR spectrum (CDCl<sub>3</sub>, 161.9 MHz, 298 K) of Ph<sub>2</sub>P(S)HNC<sub>6</sub>H<sub>4</sub>CH=N(Dipp) (**L<sup>2</sup>H**)
- S9.** <sup>13</sup>C{<sup>1</sup>H} NMR spectrum (CDCl<sub>3</sub>, 125.76 MHz, 298 K) of Ph<sub>2</sub>P(S)HNC<sub>6</sub>H<sub>4</sub>CH=N(Dipp) (**L<sup>2</sup>H**)
- S10.** <sup>1</sup>H NMR spectrum (CDCl<sub>3</sub>, 500.13 MHz, 298 K) of Ph<sub>2</sub>P(Se)HNC<sub>6</sub>H<sub>4</sub>CH=N(Dipp) (**L<sup>3</sup>H**)
- S11.** <sup>31</sup>P{<sup>1</sup>H} NMR spectrum (CDCl<sub>3</sub>, 161.9 MHz, 298 K) of Ph<sub>2</sub>P(Se)HNC<sub>6</sub>H<sub>4</sub>CH=N(Dipp) (**L<sup>3</sup>H**)
- S12.** <sup>77</sup>Se{<sup>1</sup>H} NMR spectrum (CDCl<sub>3</sub>, 76.31 MHz, 298 K) of Ph<sub>2</sub>P(Se)HNC<sub>6</sub>H<sub>4</sub>CH=N(Dipp) (**L<sup>3</sup>H**)
- S13.** <sup>13</sup>C{<sup>1</sup>H} NMR spectrum (CDCl<sub>3</sub>, 125.76 MHz, 298 K) of Ph<sub>2</sub>P(Se)HNC<sub>6</sub>H<sub>4</sub>CH=N(Dipp) (**L<sup>3</sup>H**)
- S14.** <sup>1</sup>H NMR spectrum (C<sub>6</sub>D<sub>6</sub>, 400.13 MHz, 298 K) of Ph<sub>2</sub>P(BH<sub>3</sub>)HNC<sub>6</sub>H<sub>4</sub>CH=N(Dipp) (**L<sup>4</sup>H**)
- S15.** <sup>31</sup>P{<sup>1</sup>H} NMR spectrum (C<sub>6</sub>D<sub>6</sub>, 161.9 MHz, 298 K) of Ph<sub>2</sub>P(BH<sub>3</sub>)HNC<sub>6</sub>H<sub>4</sub>CH=N(Dipp) (**L<sup>4</sup>H**)
- S16.** <sup>11</sup>B{<sup>1</sup>H} NMR spectrum (C<sub>6</sub>D<sub>6</sub>, 128.4 MHz, 298 K) of Ph<sub>2</sub>P(BH<sub>3</sub>)HNC<sub>6</sub>H<sub>4</sub>CH=N(Dipp) (**L<sup>4</sup>H**)
- S17.** <sup>1</sup>H NMR spectrum (C<sub>6</sub>D<sub>6</sub>, 500.13 MHz, 298 K) of [**L<sup>2</sup>**]Ca{N(SiMe<sub>3</sub>)<sub>2</sub>}(thf) (**2**)
- S18.** <sup>31</sup>P{<sup>1</sup>H} NMR spectrum (C<sub>6</sub>D<sub>6</sub>, 161.9 MHz, 298 K) of [**L<sup>2</sup>**]Ca{N(SiMe<sub>3</sub>)<sub>2</sub>}(thf) (**2**)
- S19.** <sup>13</sup>C{<sup>1</sup>H} NMR spectrum (C<sub>6</sub>D<sub>6</sub>, 125.76 MHz, 298 K) of [**L<sup>2</sup>**]Ca{N(SiMe<sub>3</sub>)<sub>2</sub>}(thf) (**2**)

**S20.**  $^1\text{H}$  NMR spectrum ( $\text{C}_6\text{D}_6$ , 500.13 MHz, 298 K) of [ $\{\text{L}^3\}\text{Ca}\{\text{N}(\text{SiMe}_3)_2\}(\text{thf})$ ] (**3**)

**S21.**  $^{31}\text{P}\{^1\text{H}\}$  NMR spectrum ( $\text{C}_6\text{D}_6$ , 161.9 MHz, 298 K) of [ $\{\text{L}^3\}\text{Ca}\{\text{N}(\text{SiMe}_3)_2\}(\text{thf})$ ] (**3**)

**S22.**  $^{77}\text{Se}\{^1\text{H}\}$  NMR spectrum ( $\text{C}_6\text{D}_6$ , 76.31 MHz, 298 K) of [ $\{\text{L}^3\}\text{Ca}\{\text{N}(\text{SiMe}_3)_2\}(\text{thf})$ ] (**3**)

**S23.**  $^{13}\text{C}\{^1\text{H}\}$  NMR spectrum ( $\text{C}_6\text{D}_6$ , 125.76 MHz, 298 K) of [ $\{\text{L}^3\}\text{Ca}\{\text{N}(\text{SiMe}_3)_2\}(\text{thf})$ ] (**3**)

**Table TS1. Crystallographic data and refinement parameters of L<sup>3</sup>H, 3 and 5.**

| Crystal                                     | {L <sup>3</sup> H}                                                 | 3                                                                    | 5                                                                              |
|---------------------------------------------|--------------------------------------------------------------------|----------------------------------------------------------------------|--------------------------------------------------------------------------------|
| CCDC No.                                    | 1479903                                                            | 1479904                                                              | 1479905                                                                        |
| Empirical formula                           | C <sub>31</sub> H <sub>33</sub> N <sub>2</sub> PSe                 | C <sub>41</sub> H <sub>58</sub> CaN <sub>3</sub> OPSeSi <sub>2</sub> | C <sub>62</sub> H <sub>64</sub> CaN <sub>4</sub> P <sub>2</sub> S <sub>2</sub> |
| Formula weight                              | 543.52                                                             | 815.09                                                               | 1031.31                                                                        |
| <i>T</i> (K)                                | 150(2)                                                             | 150(2)                                                               | 150(2)                                                                         |
| $\lambda$ (Å)                               | 1.54184                                                            | 0.71073                                                              | 1.54184 Å                                                                      |
| Crystal system                              | monoclinic                                                         | Triclinic                                                            | Monoclinic                                                                     |
| Space group                                 | <i>P</i> 2 <sub>1</sub> / <i>c</i>                                 | <i>P</i> -1                                                          | <i>C</i> <sub>2</sub> / <i>c</i>                                               |
| <i>a</i> (Å)                                | 13.4929(2)                                                         | 10.204(4)                                                            | 22.6518(6)                                                                     |
| <i>b</i> (Å)                                | 15.45835(19)                                                       | 16.193(7)                                                            | 10.3398(2)                                                                     |
| <i>c</i> (Å)                                | 14.4620(2)                                                         | 17.708(7)                                                            | 25.6988(7)                                                                     |
| $\alpha$ (°)                                | 90                                                                 | 65.515(14)                                                           | 90                                                                             |
| $\beta$ (°)                                 | 107.1086(16)                                                       | 85.943(12)                                                           | 115.912(3)                                                                     |
| $\gamma$ (°)                                | 90                                                                 | 73.318(14)                                                           | 90                                                                             |
| <i>V</i> (Å <sup>3</sup> )                  | 2882.97(8)                                                         | 2546.8(18)                                                           | 5413.9(3)                                                                      |
| <i>Z</i>                                    | 4                                                                  | 2                                                                    | 4                                                                              |
| <i>D</i> <sub>calc</sub> g cm <sup>-3</sup> | 1.252                                                              | 1.063                                                                | 1.265                                                                          |
| $\mu$ (mm <sup>-1</sup> )                   | 3.513                                                              | 0.945                                                                | 2.609                                                                          |
| <i>F</i> (000)                              | 2004.0                                                             | 860.0                                                                | 2184                                                                           |
| Theta range for data collection             | 8.582 to 142.26                                                    | 5.9 to 52.9                                                          | 4.796 to 71.411                                                                |
| Limiting indices                            | -15 ≤ <i>h</i> ≤ 16,<br>-8 ≤ <i>k</i> ≤ 18,<br>-17 ≤ <i>l</i> ≤ 17 | -12 ≤ <i>h</i> ≤ 12,<br>-17 ≤ <i>k</i> ≤ 20,<br>0 ≤ <i>l</i> ≤ 22    | -27 ≤ <i>h</i> ≤ 18<br>-12 ≤ <i>k</i> ≤ 12<br>-30 ≤ <i>l</i> ≤ 31              |
| Reflections collected / unique              | 10969                                                              | 10155                                                                | 14668 / 5081                                                                   |
| Completeness to theta = 71.25               | 99%                                                                | 98%                                                                  | 98.0 %                                                                         |
| Absorption correction                       | Multi-scan                                                         | Multi-scan                                                           | Multi-scan                                                                     |
| Refinement method                           | Full-matrix least-squares on <i>F</i> <sup>2</sup>                 | Full-matrix least-squares on <i>F</i> <sup>2</sup>                   | Full-matrix least-squares on <i>F</i> <sup>2</sup>                             |
| Data / restraints / parameters              | 5496/0/320                                                         | 10155/0/461                                                          | 5081/0/325                                                                     |
| Goodness-of-fit on <i>F</i> <sup>2</sup>    | 1.047                                                              | 1.148                                                                | 1.050                                                                          |
| Final R indices [I > 2σ(I)]                 | R <sub>1</sub> = 0.0574,<br><i>w</i> R <sub>2</sub> = 0.1494       | R <sub>1</sub> = 0.0879,<br><i>w</i> R <sub>2</sub> = 0.2587         | R <sub>1</sub> = 0.0372,<br><i>w</i> R <sub>2</sub> = 0.0967                   |
| R indices (all data)                        | R <sub>1</sub> = 0.0500,<br><i>w</i> R <sub>2</sub> = 0.1407       | R <sub>1</sub> = 0.1289,<br><i>w</i> R <sub>2</sub> = 0.2821         | R <sub>1</sub> = 0.0421,<br><i>w</i> R <sub>2</sub> = 0.1017                   |
| Largest diff. peak and hole                 | 0.53/-0.79 e.Å <sup>-3</sup>                                       | 3.38/-0.86 e.Å <sup>-3</sup>                                         | 0.230/-0.459 e.Å <sup>-3</sup>                                                 |

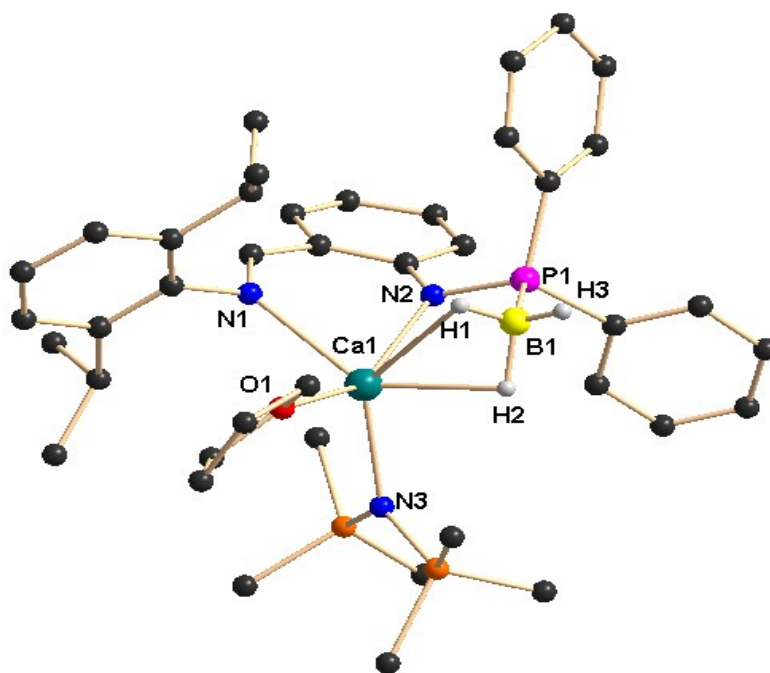

**Figure FS1.** Solid-state structure of [ $\{L^4\}CaN(SiMe_3)_2 \cdot (THF)$ ] (**4**). All hydrogen atoms (except H1, H2 and H3) are omitted for clarity. Selected bond lengths ( $\text{\AA}$ ) and angles ( $^\circ$ ): Ca1–N1 2.3668(18), Ca1–N2 2.5156(18), Ca1–N3 2.298(2), Ca1–O1 2.3553(16), Ca1–H1 2.49(3), Ca1–H2 2.55(3), N1–Ca1–N2 74.08(6), N1–Ca1–N3 115.38(7), N1–Ca1–O1 146.76(6), N2–Ca1–N3 128.91(7), N2–Ca1–O1 87.28(6), N3–Ca1–O1 97.78(7).

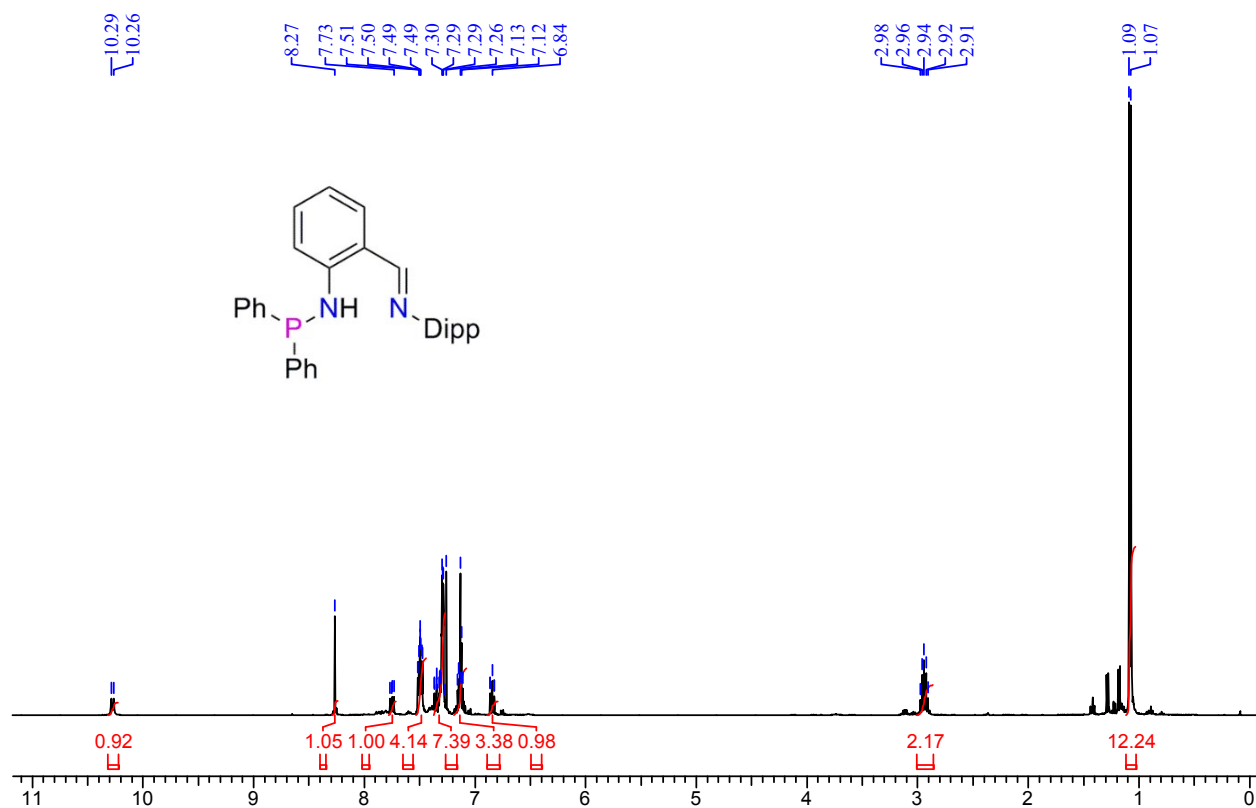

S1. <sup>1</sup>H NMR spectrum (CDCl<sub>3</sub>, 500.13 MHz, 298 K) of Ph<sub>2</sub>PHNC<sub>6</sub>H<sub>4</sub>CH=N(Dipp) (L<sup>0</sup>}H)

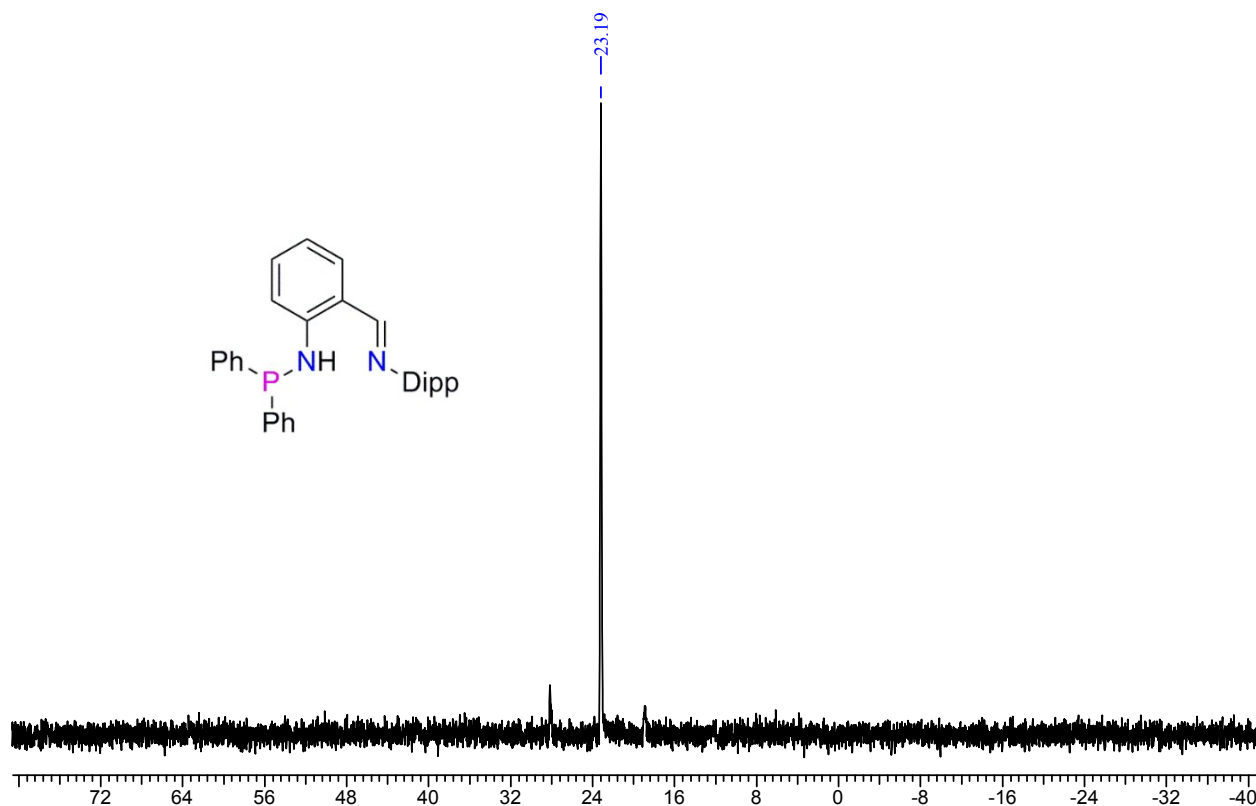

S2. <sup>31</sup>P {<sup>1</sup>H} NMR spectrum (CDCl<sub>3</sub>, 161.9 MHz, 298 K) of Ph<sub>2</sub>PHNC<sub>6</sub>H<sub>4</sub>CH=N(Dipp) (L<sup>0</sup>}H)

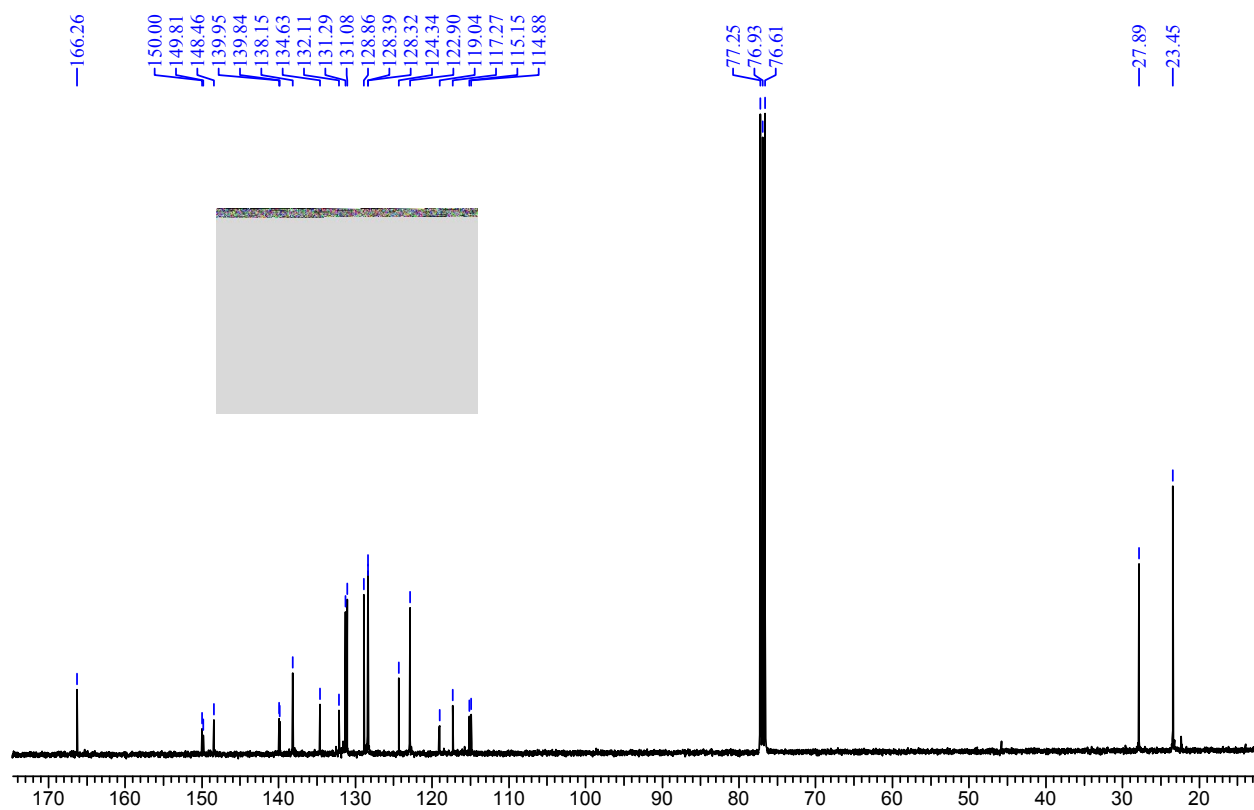

S3.  $^{13}\text{C}\{^1\text{H}\}$  NMR spectrum ( $\text{CDCl}_3$ , 125.76 MHz, 298 K) of  $\text{Ph}_2\text{PHNC}_6\text{H}_4\text{CH}=\text{N}(\text{Dipp})$  ( $\text{L}^0\text{H}$ )

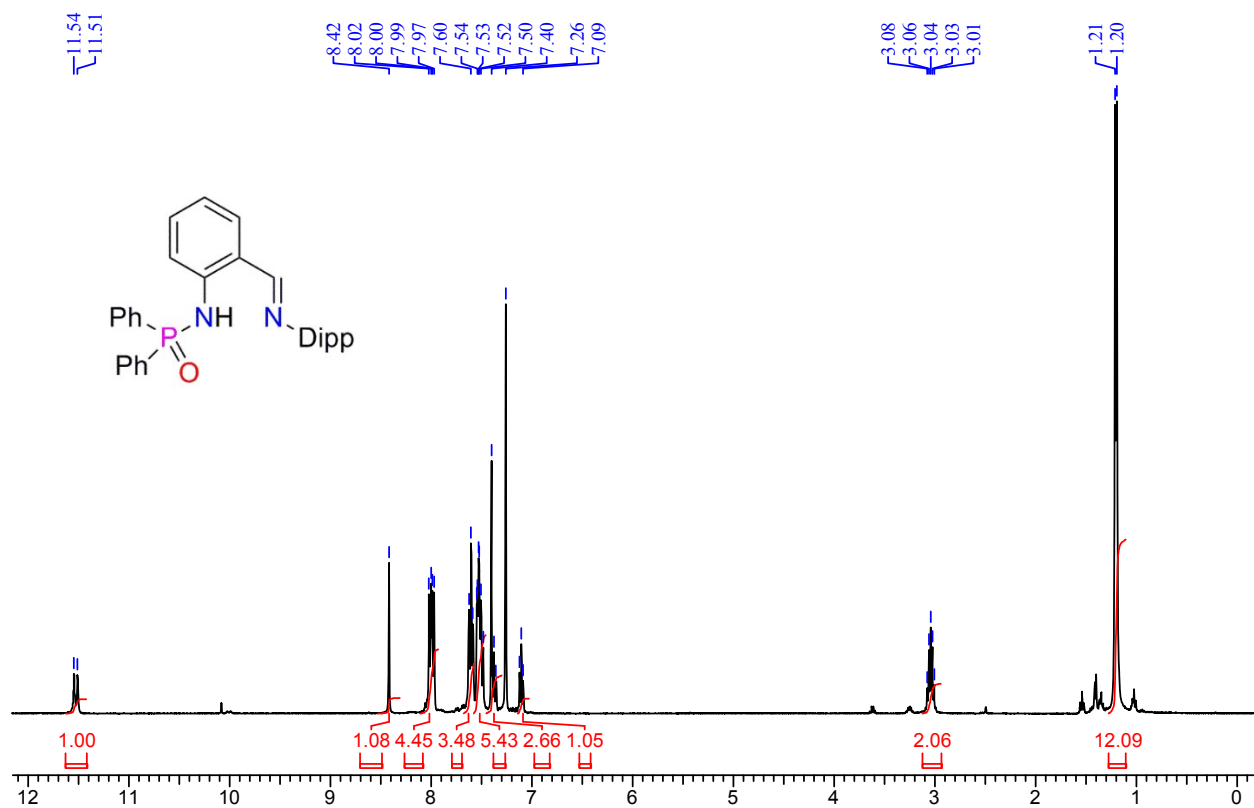

S4.  $^1\text{H}$  NMR spectrum ( $\text{CDCl}_3$ , 500.13 MHz, 298 K) of  $\text{Ph}_2\text{P}(\text{O})\text{HNC}_6\text{H}_4\text{CH}=\text{N}(\text{Dipp})$  ( $\text{L}^1\text{H}$ )

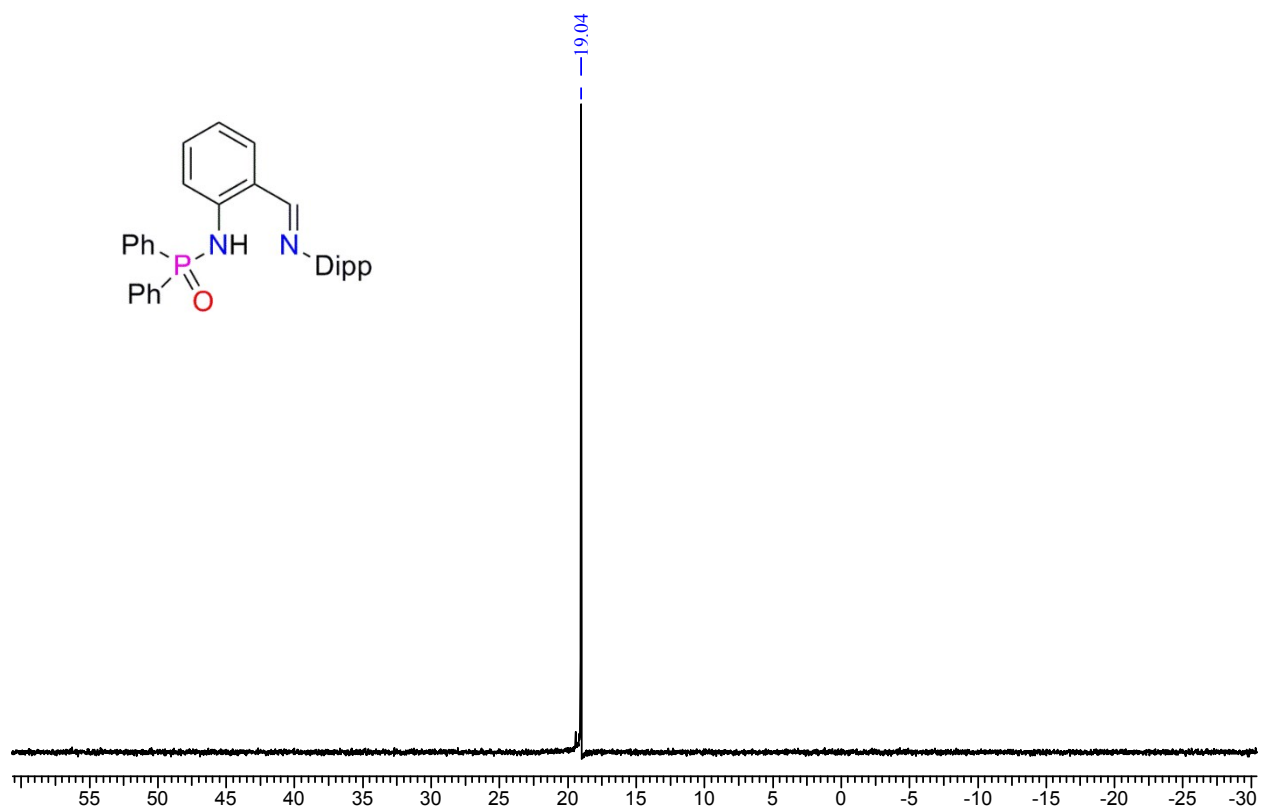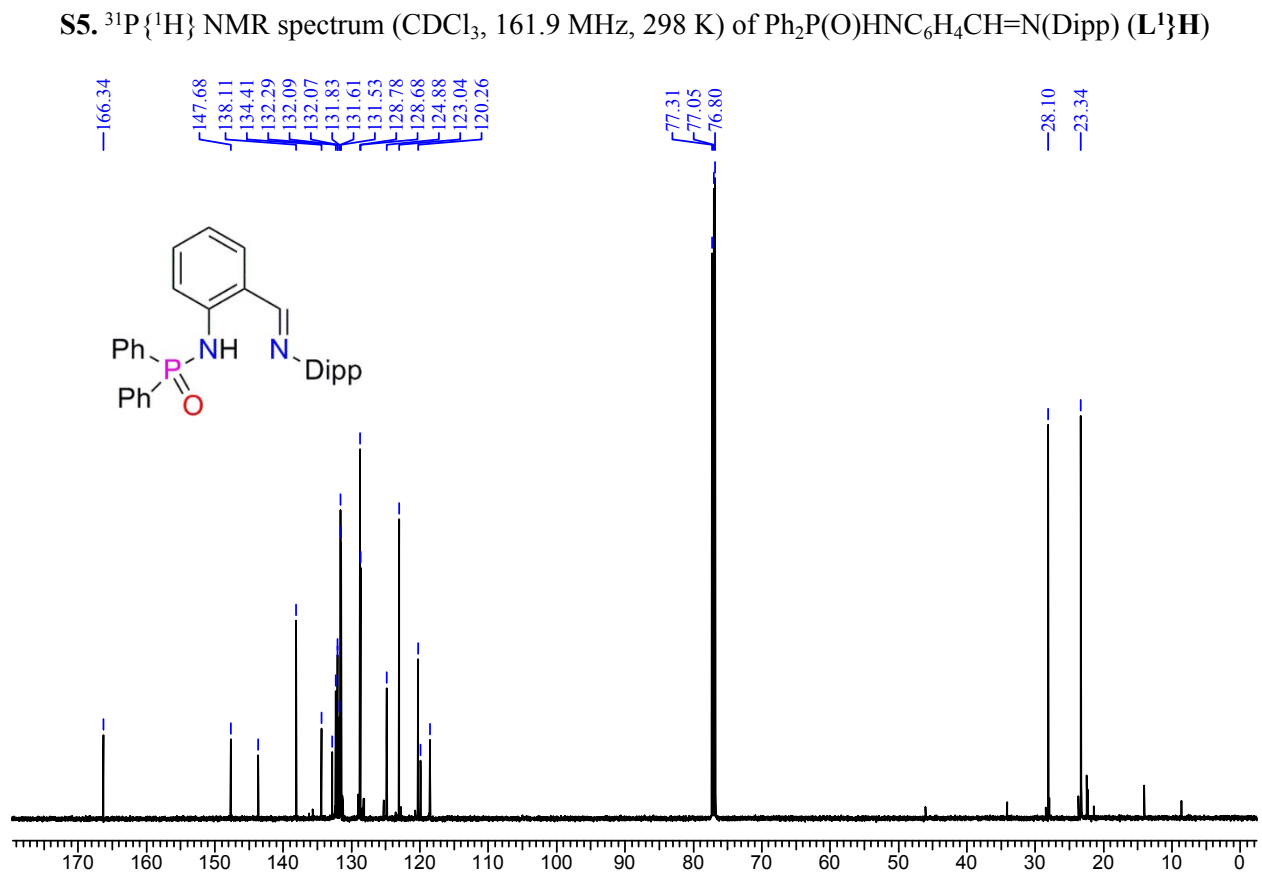

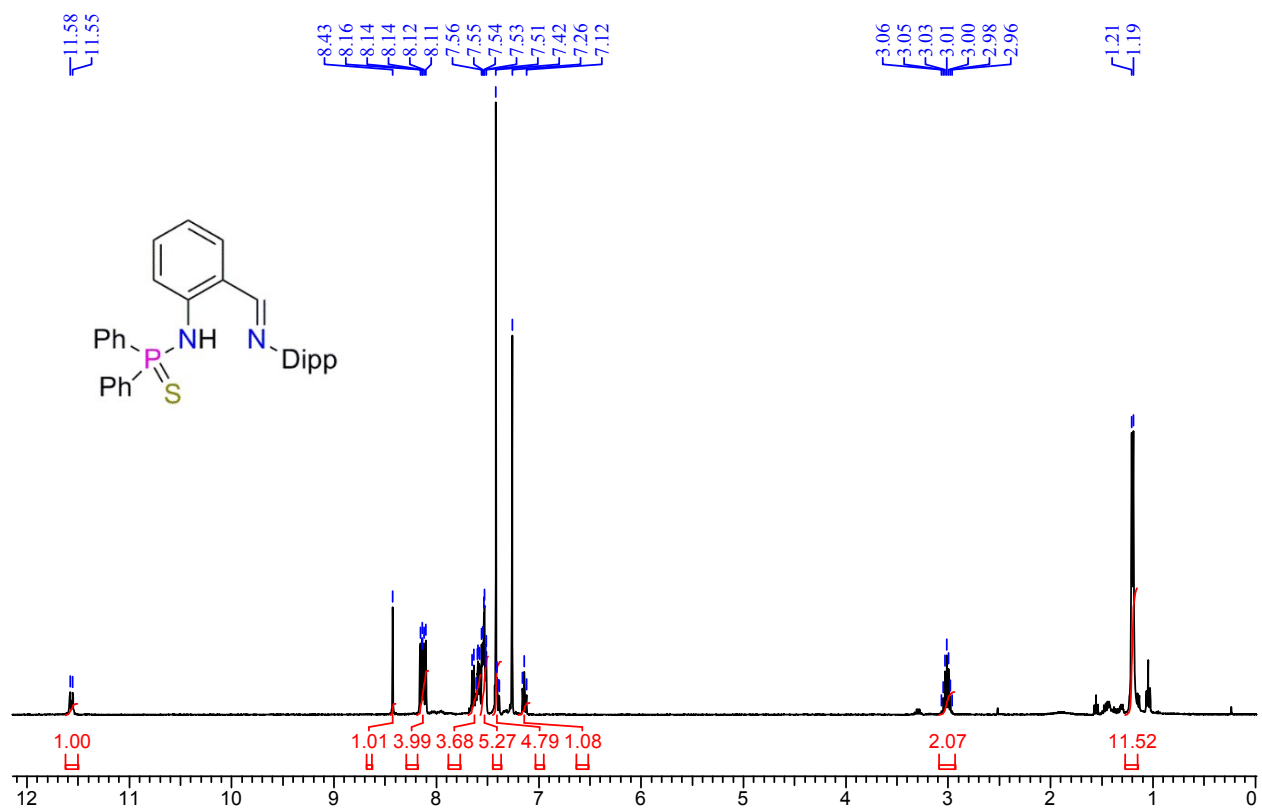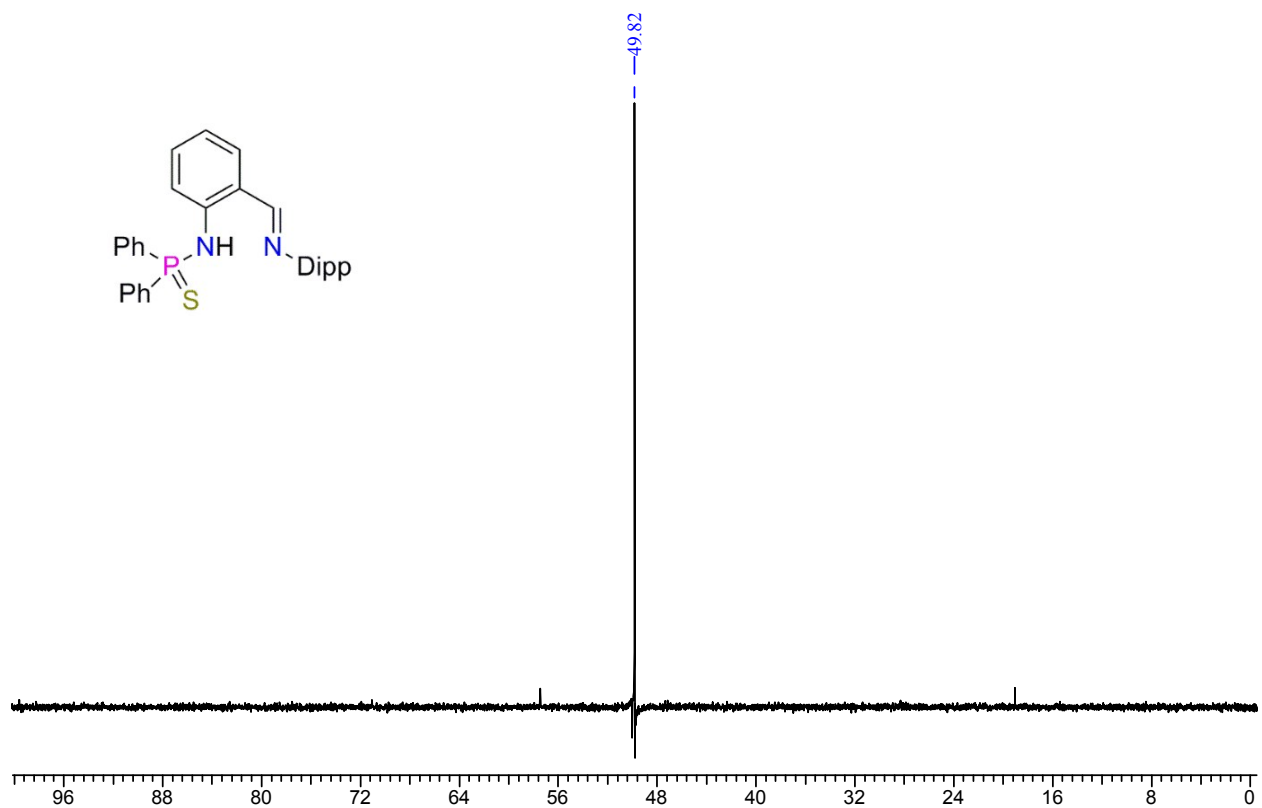



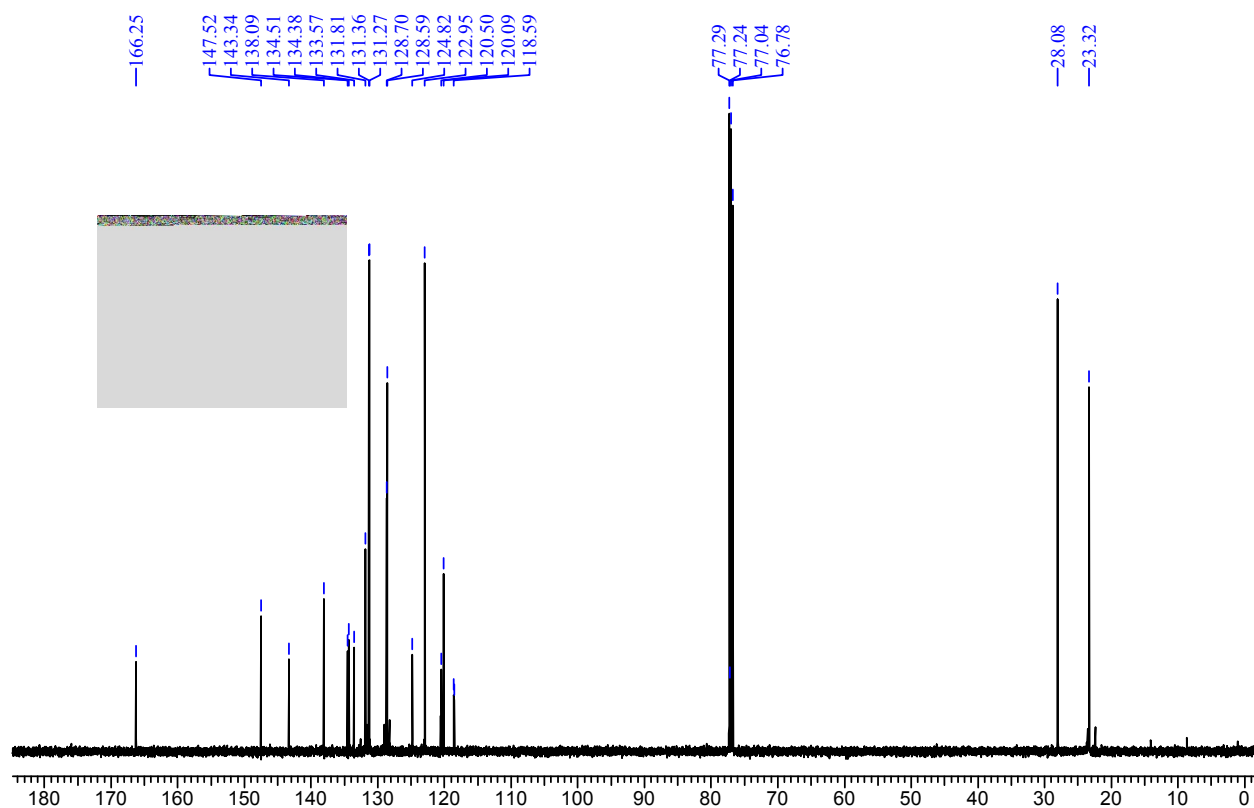

**S9.**  $^{13}\text{C}\{^1\text{H}\}$  NMR spectrum ( $\text{CDCl}_3$ , 125.76 MHz, 298 K) of  $\text{Ph}_2\text{P(S)HNC}_6\text{H}_4\text{CH=N(Dipp)}$  ( $\text{L}^2\text{H}$ )

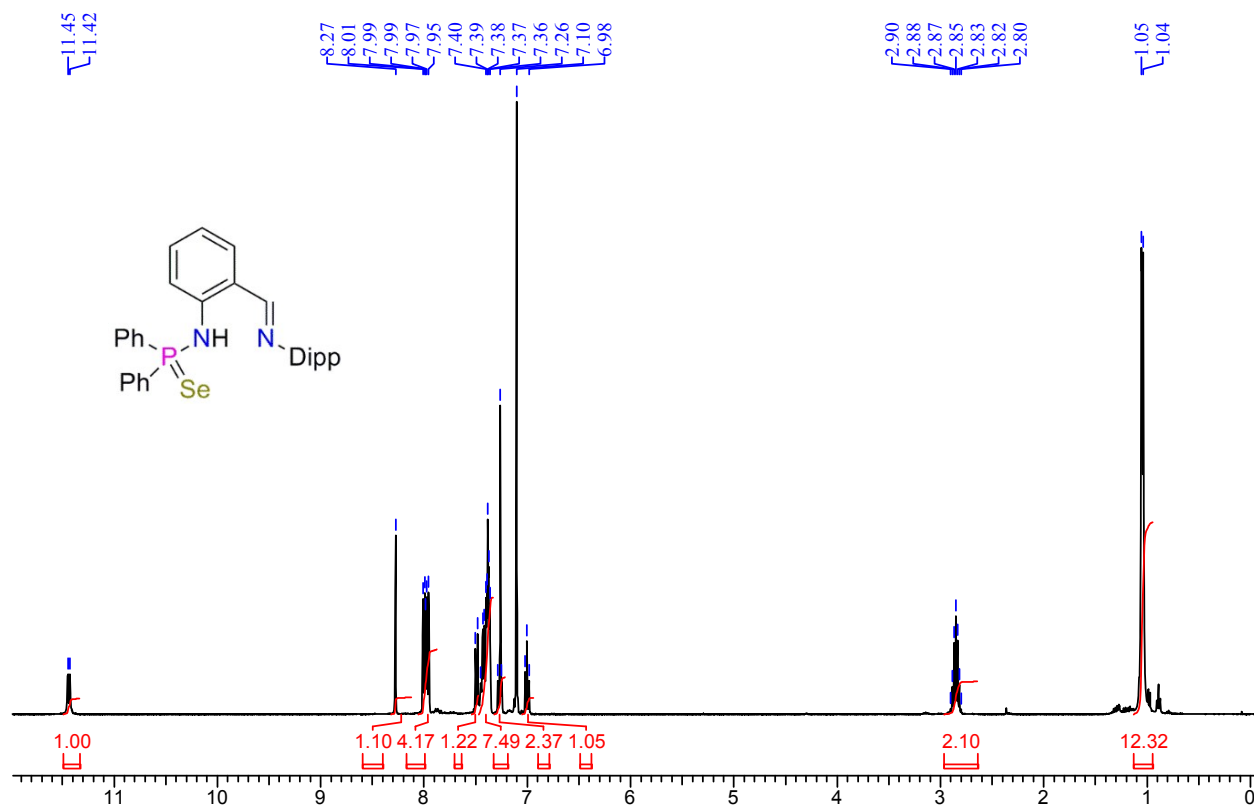

**S10.**  $^1\text{H}$  NMR spectrum ( $\text{CDCl}_3$ , 500.13 MHz, 298 K) of  $\text{Ph}_2\text{P(Se)HNC}_6\text{H}_4\text{CH=N(Dipp)}$  ( $\text{L}^3\text{H}$ )

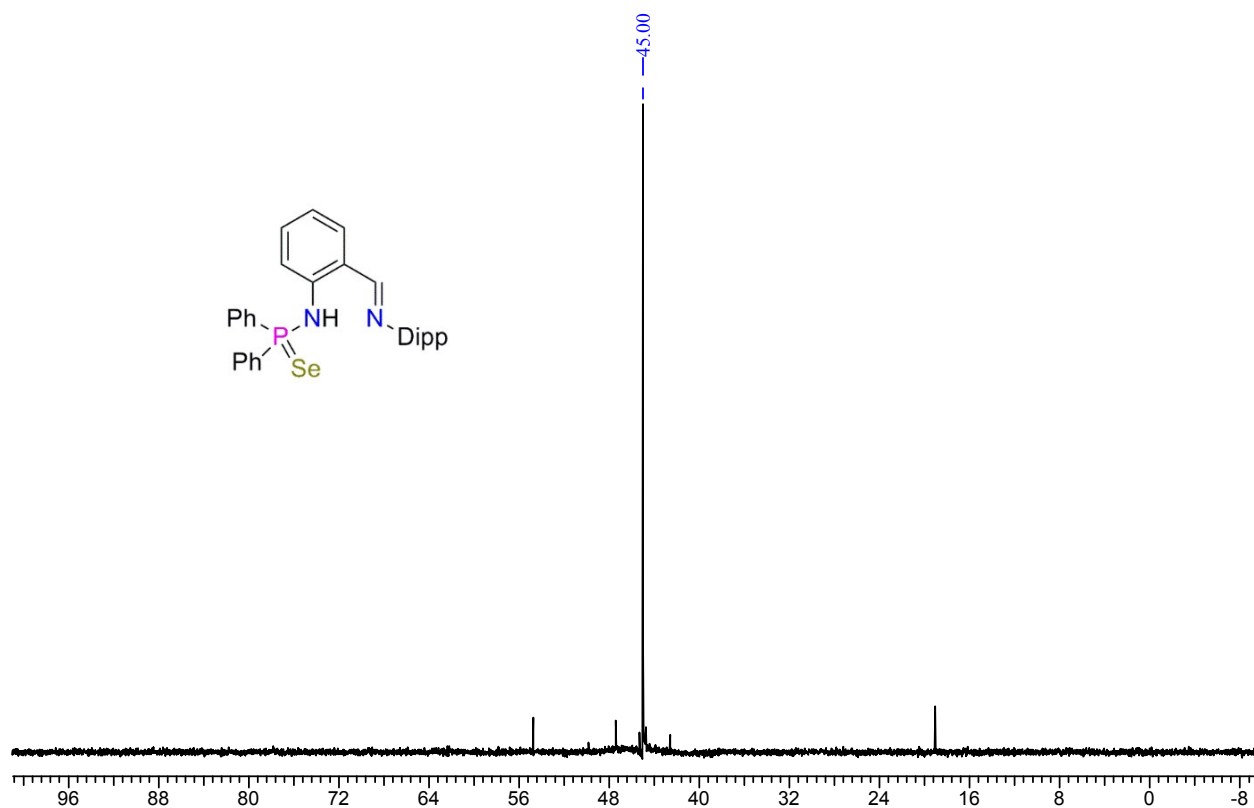

**S11.**  $^{31}\text{P}\{^1\text{H}\}$  NMR spectrum ( $\text{CDCl}_3$ , 161.9 MHz, 298 K) of  $\text{Ph}_2\text{P}(\text{Se})\text{HNC}_6\text{H}_4\text{CH}=\text{N}(\text{Dipp})$  (**L<sup>3</sup>H**)

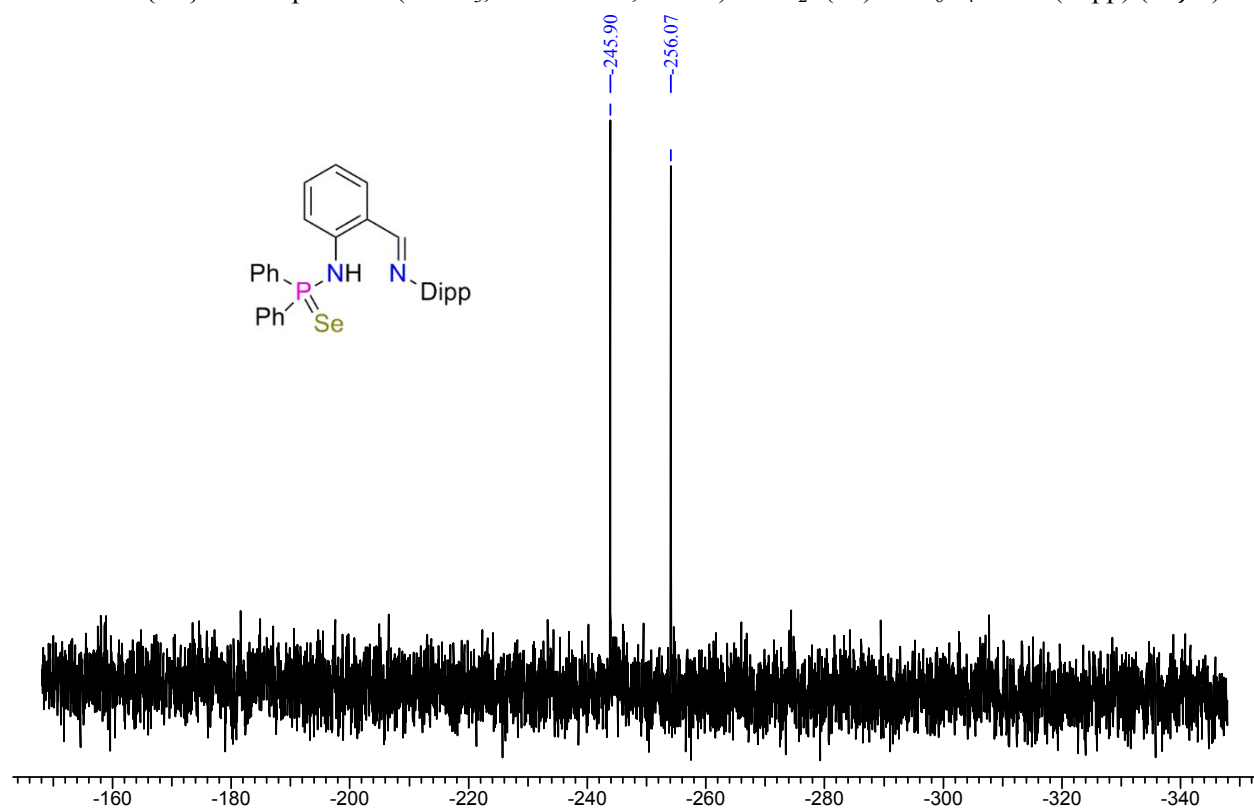

**S12.**  $^{77}\text{Se}\{^1\text{H}\}$  NMR spectrum ( $\text{CDCl}_3$ , 76.31 MHz, 298 K) of  $\text{Ph}_2\text{P}(\text{Se})\text{HNC}_6\text{H}_4\text{CH}=\text{N}(\text{Dipp})$  (**L<sup>3</sup>H**)

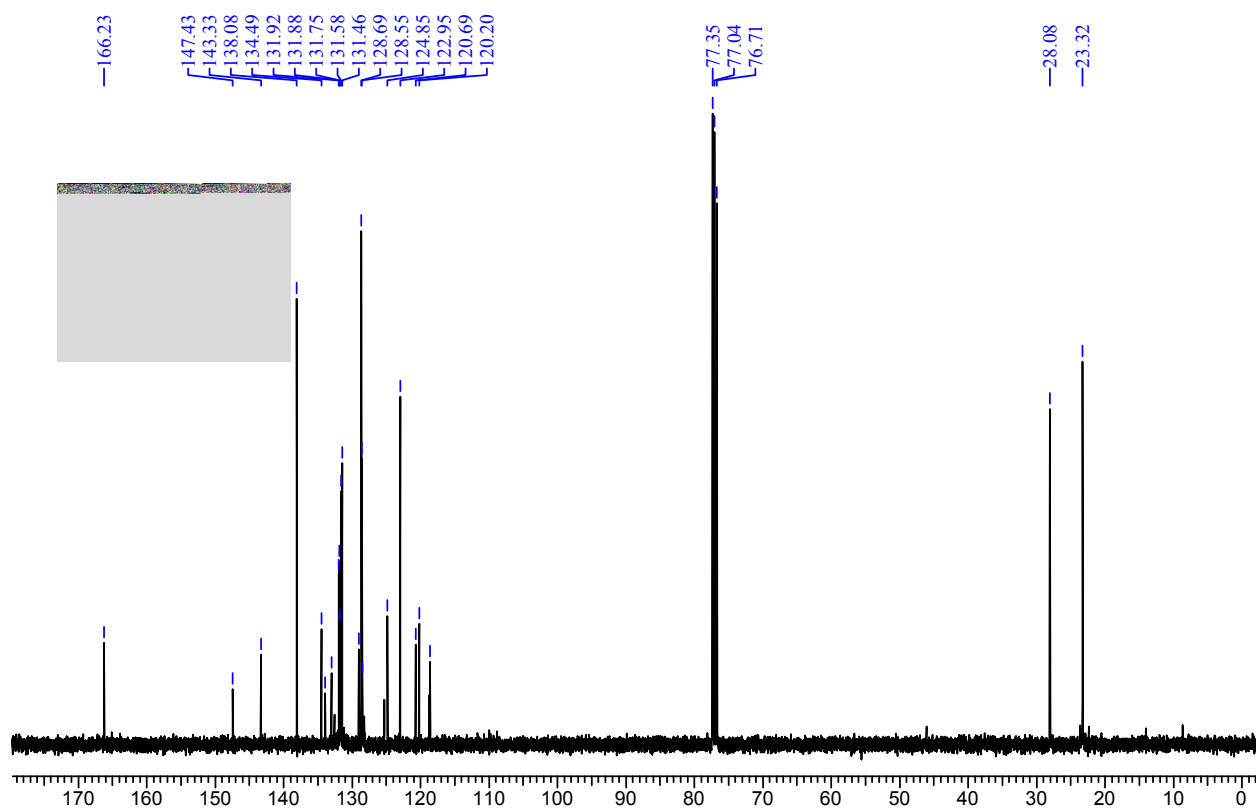

**S13.**  $^{13}\text{C}\{^1\text{H}\}$  NMR spectrum ( $\text{CDCl}_3$ , 125.76 MHz, 298 K) of  $\text{Ph}_2\text{P}(\text{Se})\text{HNC}_6\text{H}_4\text{CH}=\text{N}(\text{Dipp})$  ( $\text{L}^3\text{H}$ )

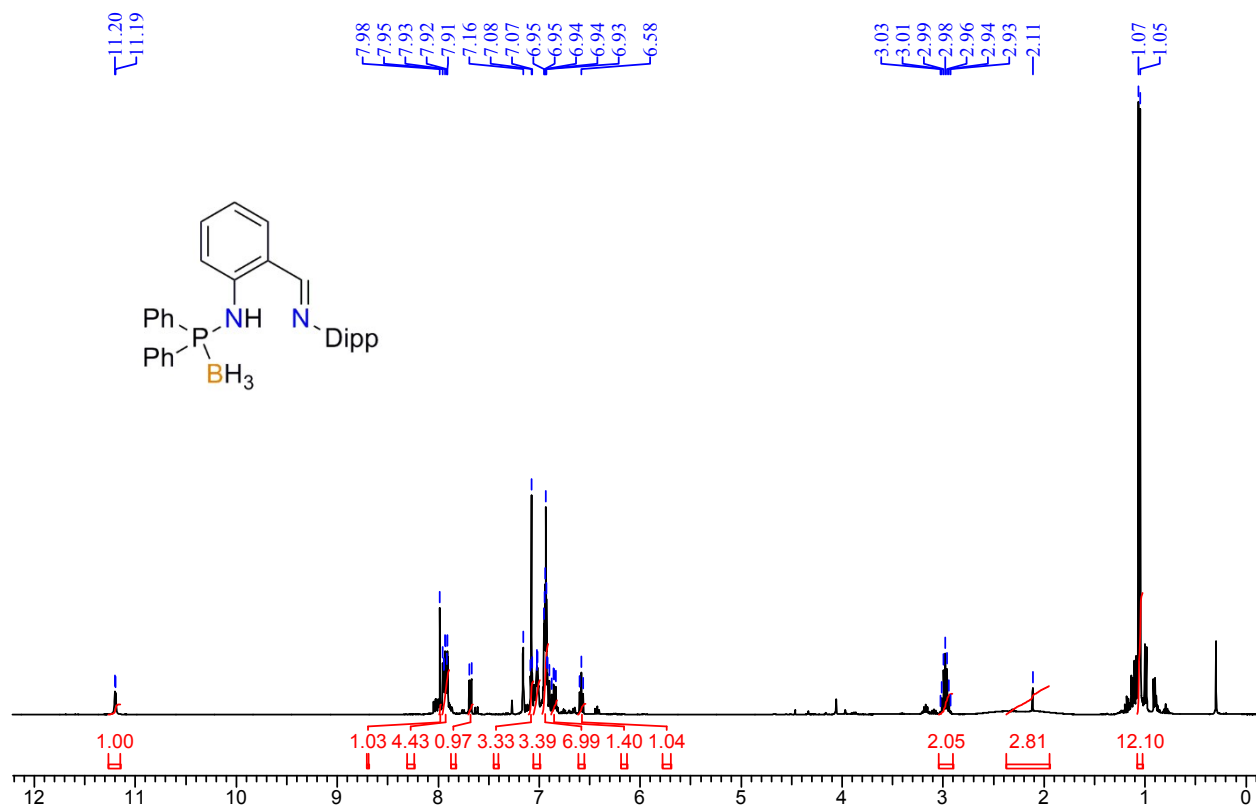

**S14.**  $^1\text{H}$  NMR spectrum ( $\text{C}_6\text{D}_6$ , 400.13 MHz, 298 K) of  $\text{Ph}_2\text{P}(\text{BH}_3)\text{HNC}_6\text{H}_4\text{CH}=\text{N}(\text{Dipp})$  ( $\text{L}^4\text{H}$ )

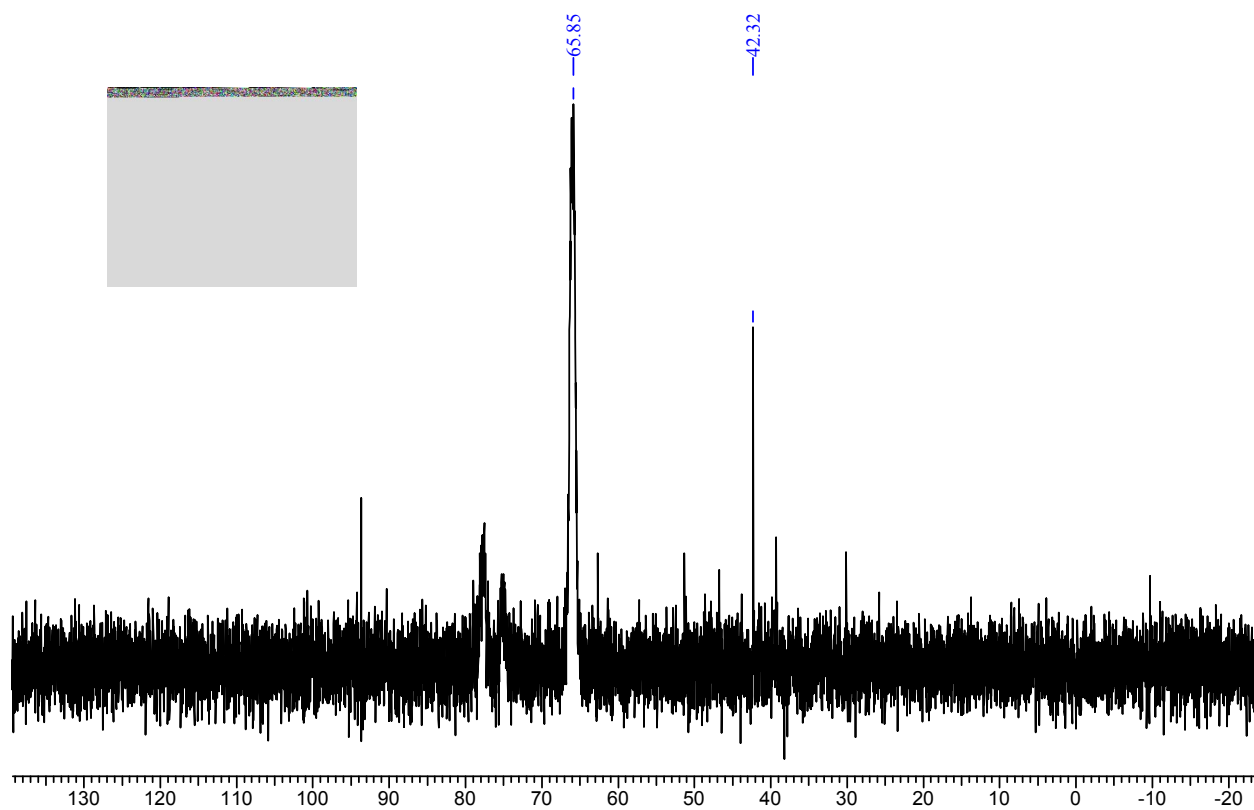

**S15.**  $^{31}\text{P}\{^1\text{H}\}$  NMR spectrum ( $\text{C}_6\text{D}_6$ , 161.9 MHz, 298 K) of  $\text{Ph}_2\text{P}(\text{BH}_3)\text{HNC}_6\text{H}_4\text{CH}=\text{N}(\text{Dipp})$  ( $\text{L}^4\text{H}$ )

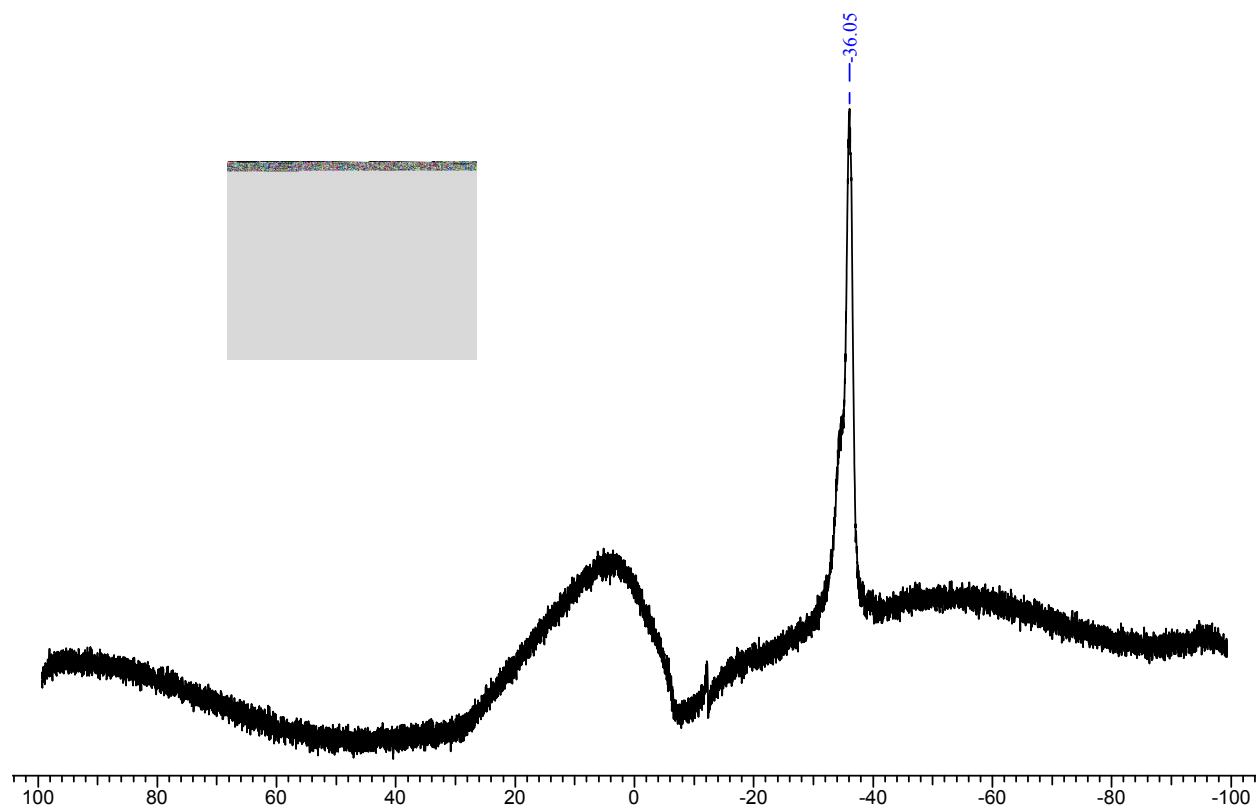

**S16.**  $^{11}\text{B}\{^1\text{H}\}$  NMR spectrum ( $\text{C}_6\text{D}_6$ , 128.4 MHz, 298 K) of  $\text{Ph}_2\text{P}(\text{BH}_3)\text{HNC}_6\text{H}_4\text{CH}=\text{N}(\text{Dipp})$  ( $\text{L}^4\text{H}$ )



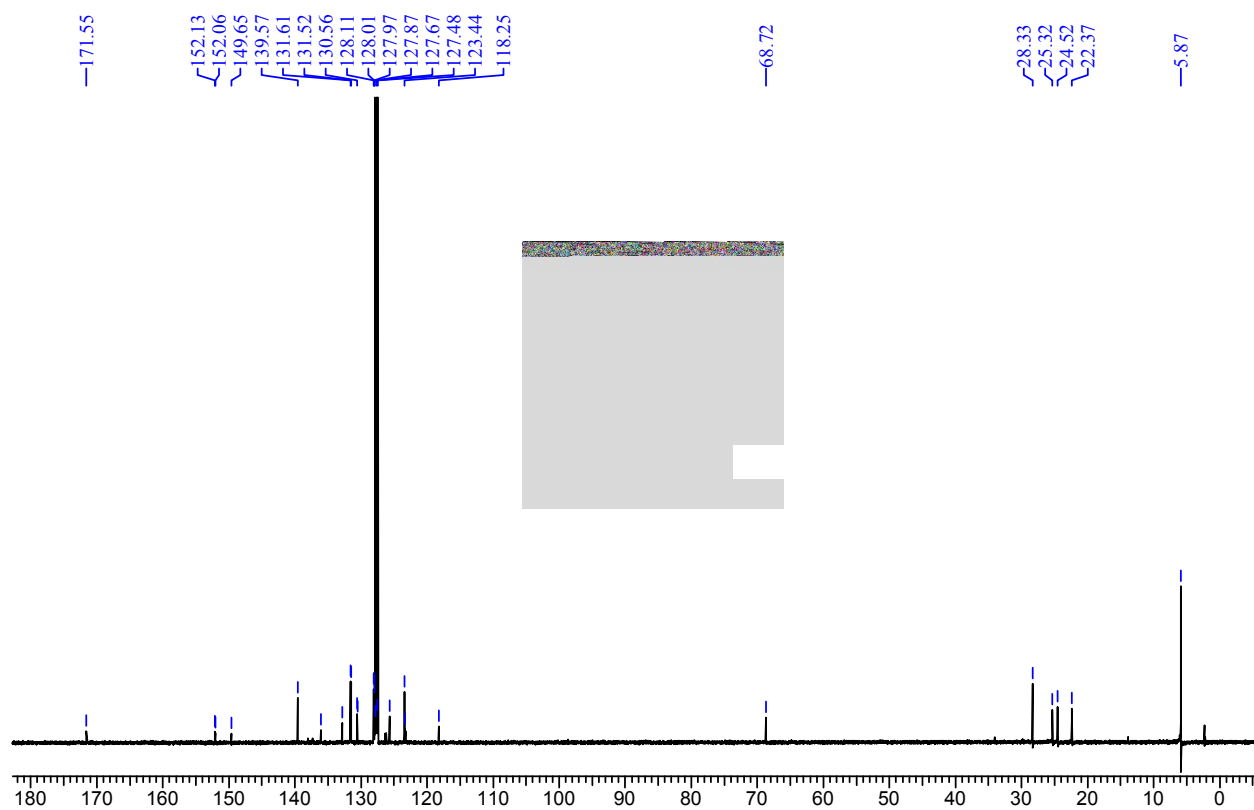

**S19.**  $^{13}\text{C}\{^1\text{H}\}$  NMR spectrum ( $\text{C}_6\text{D}_6$ , 125.76 MHz, 298 K) of  $[\{\text{L}^2\}\text{Ca}\{\text{N}(\text{SiMe}_3)_2\}(\text{thf})]$  (**2**)

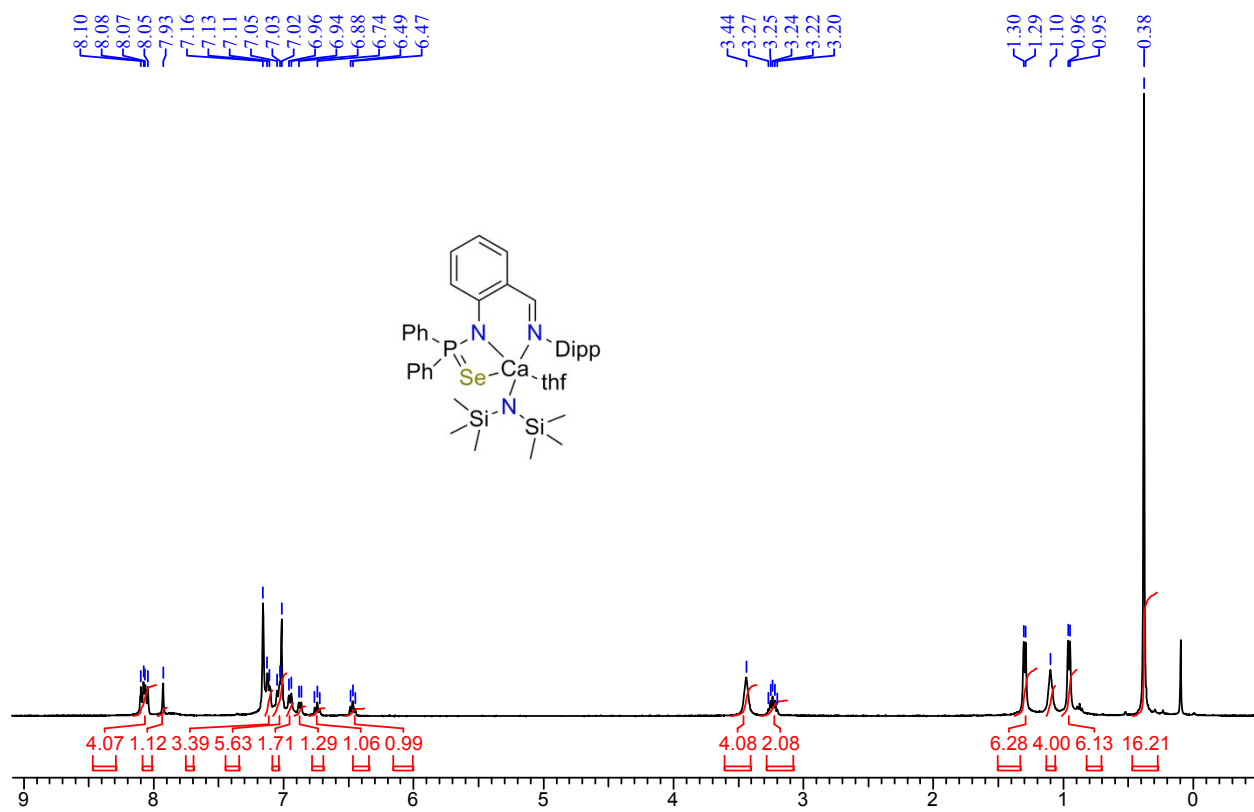

**S20.**  $^1\text{H}$  NMR spectrum ( $\text{C}_6\text{D}_6$ , 500.13 MHz, 298 K) of  $[\{\text{L}^3\}\text{Ca}\{\text{N}(\text{SiMe}_3)_2\}(\text{thf})]$  (**3**)

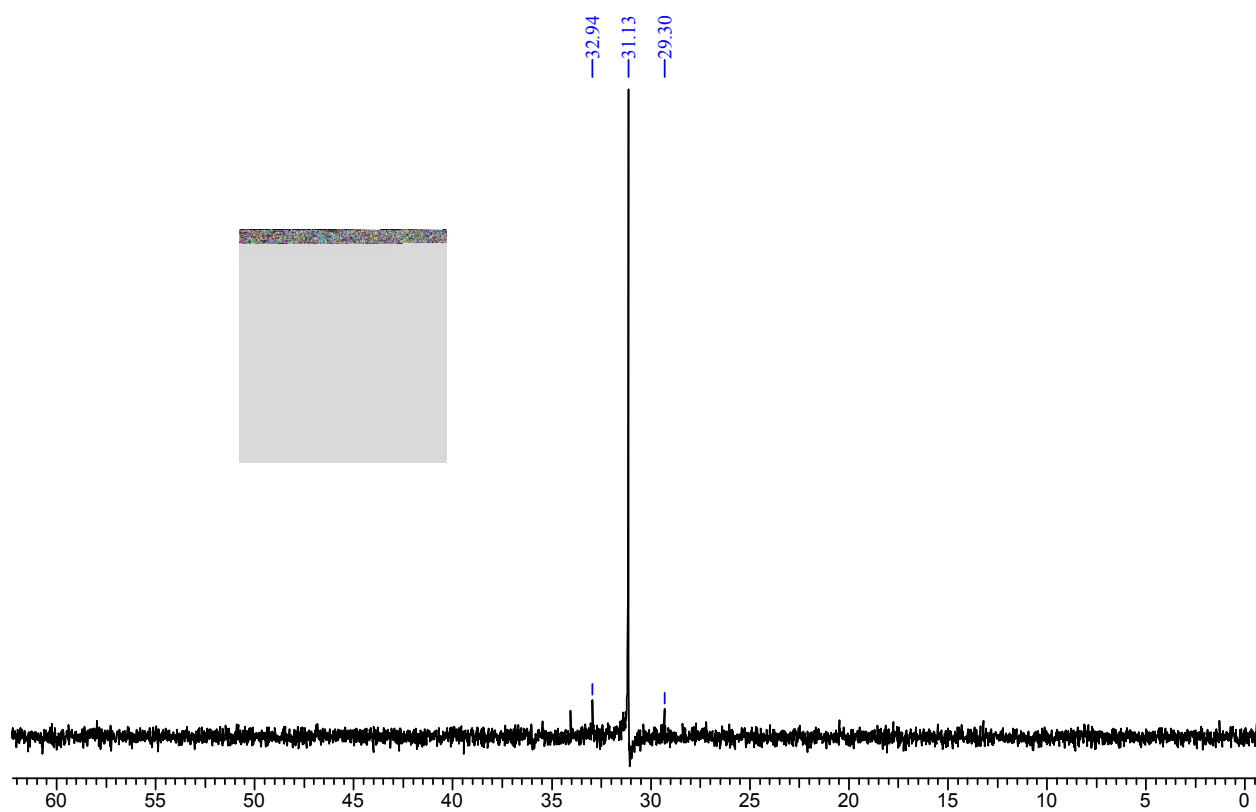

S21.  $^{31}\text{P}\{^1\text{H}\}$  NMR spectrum ( $\text{C}_6\text{D}_6$ , 161.9 MHz, 298 K) of [ $\text{L}^3$ ]Ca{N(SiMe $_3$ ) $_2$ }(thf)] (**3**)

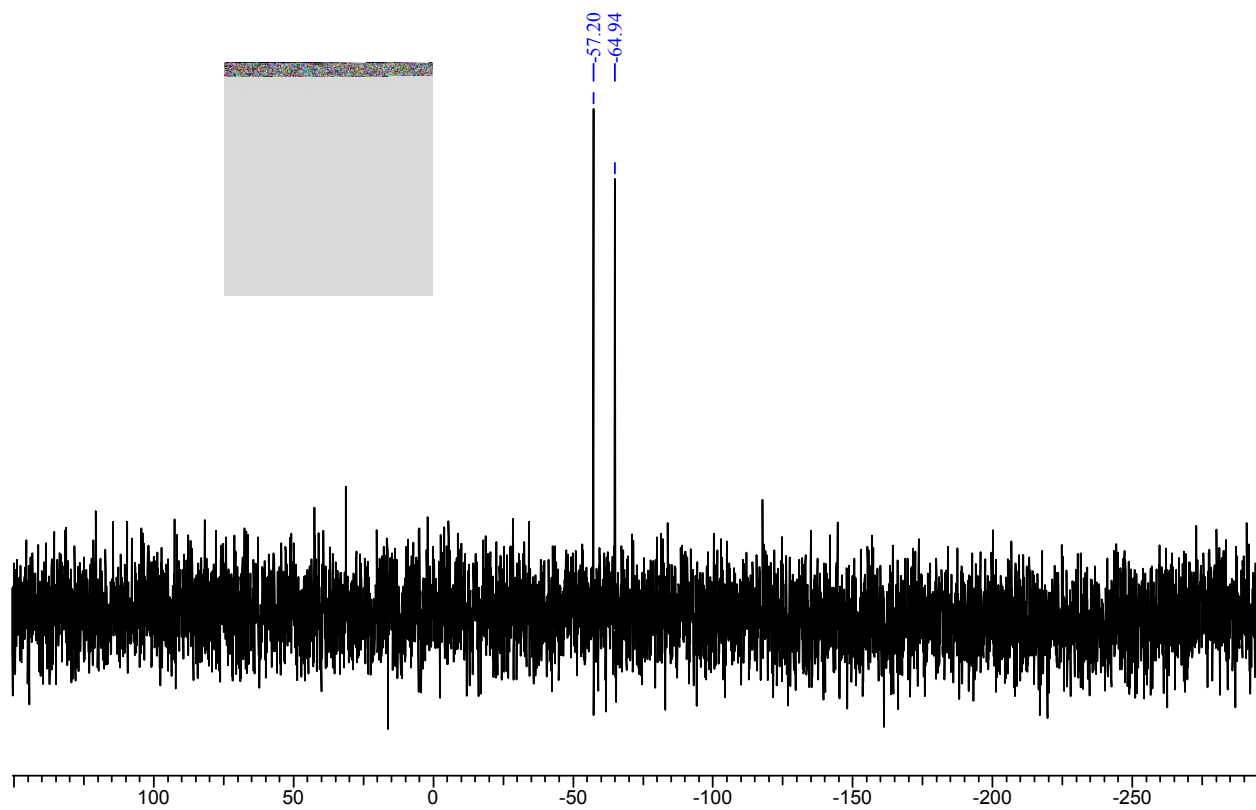

S22.  $^{77}\text{Se}\{^1\text{H}\}$  NMR spectrum ( $\text{C}_6\text{D}_6$ , 76.31 MHz, 298 K) of [ $\text{L}^3$ ]Ca{N(SiMe $_3$ ) $_2$ }(thf)] (**3**)

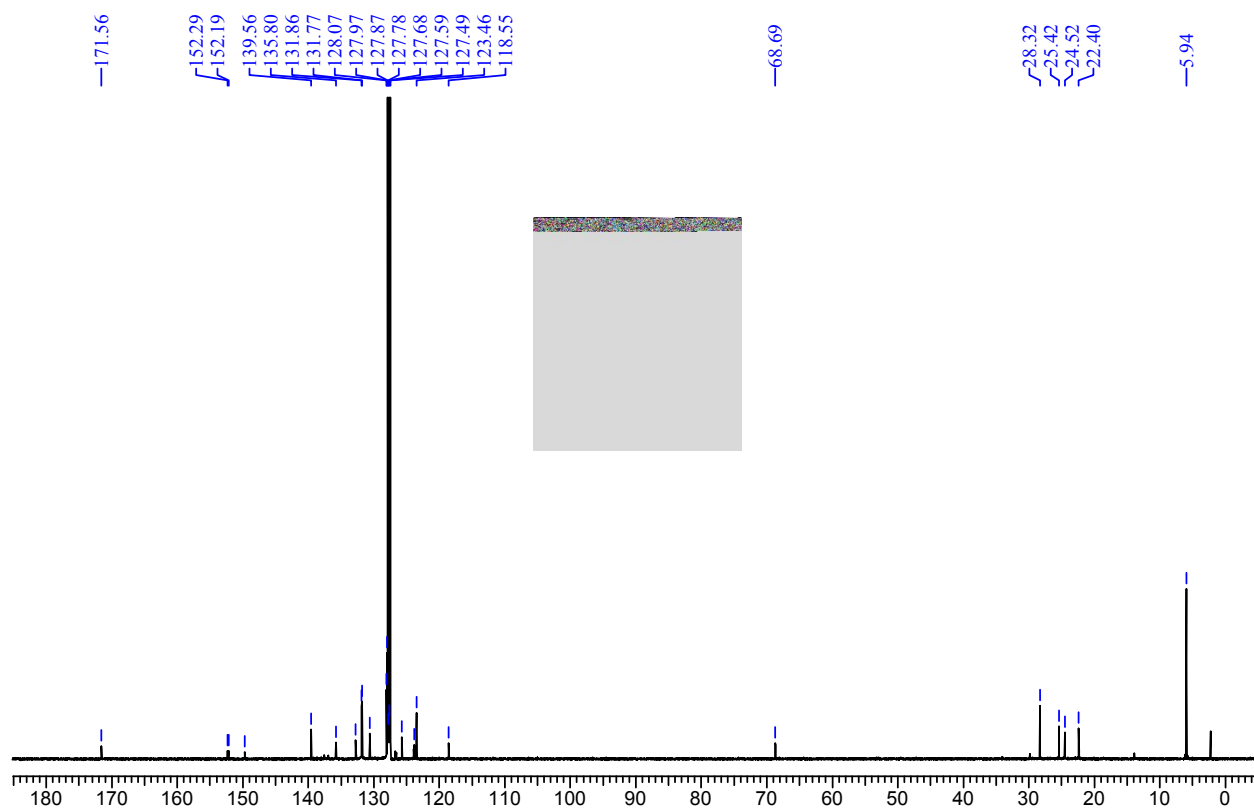

**S23.**  $^{13}\text{C}\{^1\text{H}\}$  NMR spectrum ( $\text{C}_6\text{D}_6$ , 125.76 MHz, 298 K) of  $[\{\text{L}^3\}\text{Ca}\{\text{N}(\text{SiMe}_3)_2\}(\text{thf})]$  (**3**)
